# Supplementary material
Source: publisher figshare collection journal article supplement (https://future-science-group.figshare.com/ndownloader/files/33851522)
Supplement: Supplementary file 1 [file 33851522]

# Supplementary Material 7: Equipment

1. Core equipment cost and size

| **Core equipment** | **Equipment cost (USD)** | **Equipment width (m)** | **Equipment depth (m)** | **Floorspace requirement (m2)** |
| --- | --- | --- | --- | --- |
| Isolator with filling line | 188,000 | 2.80 | 1.10 | 8 |
| TFF | 80,000 | 1.80 | 0.80 | 5 |
| *Tube Welder* | 18,700 | 0.20 | 0.34 | 2 |
| *Tube Sealer* | 13,500 | 0.07 | 0.34 | 1 |
| Refrigerator | 7,200 | 0.77 | 0.83 | 3 |
| Freezer (-20 oC) | 7,200 | 0.77 | 0.83 | 3 |
| Freezer (-80 oC) | 7,200 | 0.77 | 0.83 | 3 |
| Cryogenic freezer | 30,000 | 0.88 | 1.04 | 4 |
| Controlled rate freezer | 16,000 | 0.81 | 0.52 | 3 |

1. QC equipment cost and size

| **QC Equipment** | **Equipment cost (USD)** | **Equipment size(w)** | **Equipment size (d)** | **Floorspace requirement (m2)** |
| --- | --- | --- | --- | --- |
| Microscope | 11,000 | 0.21 | 0.36 | 1.64 |
| Vi-cell | 65,500 | 0.91 | 0.62 | 3.09 |
| Flow cytometer | 65,500 | 0.91 | 0.62 | 3.09 |
| PCR | 58,950 | 0.50 | 0.50 | 2.25 |
| ELISA plate reader | 50,000 | 0.42 | 0.46 | 2.07 |
| Isolator-2 glove | 238,340 | 1.30 | 0.90 | 4.37 |
| Incubator | 23,000 | 1.67 | 0.92 | 5.13 |
| Endosafe | 12,145 | 0.20 | 0.25 | 1.50 |
| BacT-alert | 32,500 | 0.60 | 0.50 | 2.40 |
